# Supplementary material for: The influence of QTL allelic diversity on QTL detection in multi-parent populations: a simulation study in sugar beet
Source: PubMed Central journal article supplement (PMC7860181; doi:10.1186/s12863-021-00960-9), 2021-02-03
Supplement: 12863_2021_960_MOESM1_ESM.pdf [file 12863_2021_960_MOESM1_ESM.pdf]

## Genetic map used to simulate the QTL effects

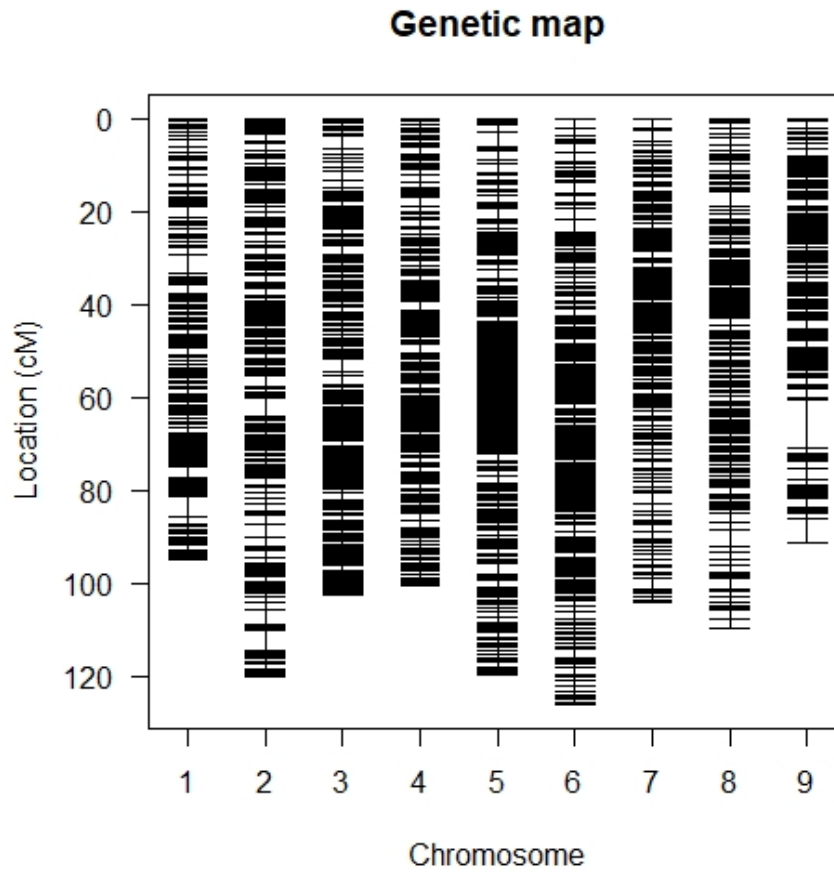

| Chromosome | N    | Length(cM) | Average spacing | maximum spacing |
|------------|------|------------|-----------------|-----------------|
| 1          | 424  | 94.7       | 0.2             | 4.3             |
| 2          | 390  | 120.2      | 0.3             | 4.2             |
| 3          | 694  | 102.5      | 0.1             | 3.0             |
| 4          | 577  | 100.5      | 0.2             | 2.2             |
| 5          | 676  | 119.5      | 0.2             | 3.3             |
| 6          | 705  | 126.0      | 0.2             | 3.0             |
| 7          | 585  | 103.9      | 0.2             | 2.4             |
| 8          | 509  | 109.7      | 0.2             | 3.5             |
| 9          | 440  | 91.3       | 0.2             | 10.6            |
| Overall    | 5000 | 968.3      | 0.2             | 10.6            |
