# Supplementary material for: The influence of QTL allelic diversity on QTL detection in multi-parent populations: a simulation study in sugar beet
Source: PubMed Central journal article supplement (PMC7860181; doi:10.1186/s12863-021-00960-9), 2021-02-03

## Illustration of the simulated QTL effect on the reference diallel

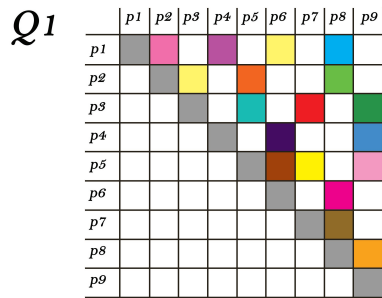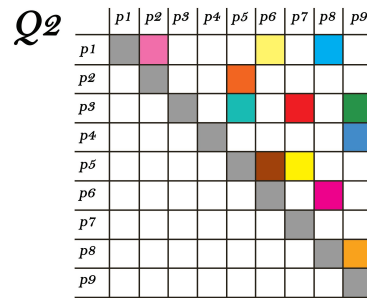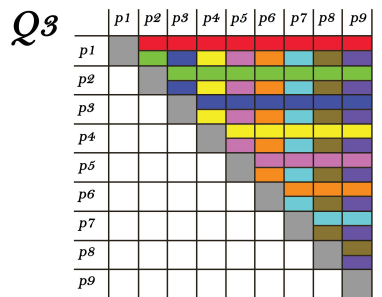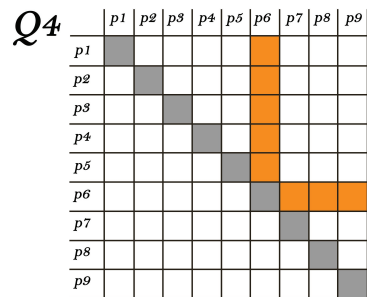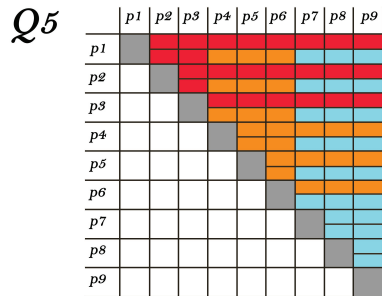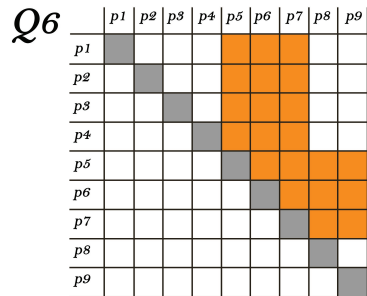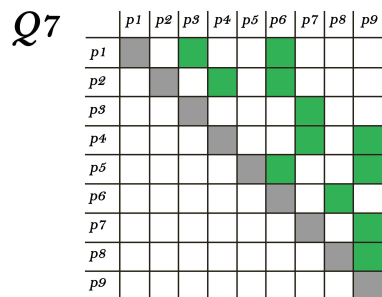

Supplement: 12863_2021_960_MOESM2_ESM.pdf [file 12863_2021_960_MOESM2_ESM.pdf]
