# Supplementary material for: The influence of QTL allelic diversity on QTL detection in multi-parent populations: a simulation study in sugar beet
Source: PubMed Central journal article supplement (PMC7860181; doi:10.1186/s12863-021-00960-9), 2021-02-03
Supplement: 12863_2021_960_MOESM3_ESM.pdf [file 12863_2021_960_MOESM3_ESM.pdf]

## Phenotypic values simulation procedure

For each realizations, phenotypic values were simulated at the level of the reference diallel population (36 crosses with 450 genotypes). The  $i^{th}$  realization included the following steps:

1. The phenotypic variance was expressed in terms of QTL and random error variance  $\sigma_p^2 = \sigma_Q^2 + \sigma_e^2$ . We assumed a strict additivity of these components.
2. We randomly sampled the 8 QTL positions ( $q_1, \dots, q_8$ ). Each QTL was on a different chromosome. We assumed that the QTL positions were independent and that the global QTL variance ( $\sigma_Q^2$ ) was the sum of each individual QTL variance contribution ( $\sigma_Q^2 = \sum_{i=1}^{n_{QTL}} \sigma_{qi}^2$ ). We calculated the individual QTL variance using  $\sigma_{qi}^2 = V(\mathbf{X}_{qi}\beta_i)$  where  $X_{qi}$  and  $\beta_i$  are the incidence matrix and the allelic effect of QTL  $i$ . The incidence matrix  $X_{qi}$  took different forms according to the type of simulated QTL effect (cross-specific, parental, ancestral, bi-allelic). The form of  $\beta_i$  followed the definition of the simulated QTLs (Q1-7). The non-zero elements of  $\beta_i$  were sampled from a uniform distribution (1-10) with random sign assignment. We scaled the  $\beta_i$  values to make sure that the  $\sigma_{qi}^2$  reached the desired phenotypic proportion (2 or 6 %). Finally we calculated the QTL contribution to the phenotype using  $\mathbf{y}_Q = \mathbf{X}_Q\beta$ .
3. We determined the error variance contribution ( $\sigma_e^2$ ) such that  $\sigma_e^2 = ((1 - h^2)/h^2) * \sigma_Q^2$ . In all cases,  $h^2$  was equal to 0.32. Given  $\sigma_e^2$  we sample the phenotypic variation due to the error using  $\mathbf{y}_e \sim N(0, \sigma_e^2)$ . The simulated phenotypic values were therefore expressed as  $\mathbf{y}_{sim} = \mathbf{y}_Q + \mathbf{y}_e$ .
4. In many cases, even if the QTLs were sampled on different chromosomes, there was still an important covariance between the QTL positions. Therefore, we sampled a large number of realizations and we kept only the one where the covariance between the QTL positions was inferior to 1% of the total phenotypic variance.
