# Supplementary material for: The influence of QTL allelic diversity on QTL detection in multi-parent populations: a simulation study in sugar beet
Source: PubMed Central journal article supplement (PMC7860181; doi:10.1186/s12863-021-00960-9), 2021-02-03

# Histograms of the distance between simulated and detected QTL distributions

The red, blue, and black dashed lines represent the 90, 95 and 99 distribution percentiles.

$N = 800$

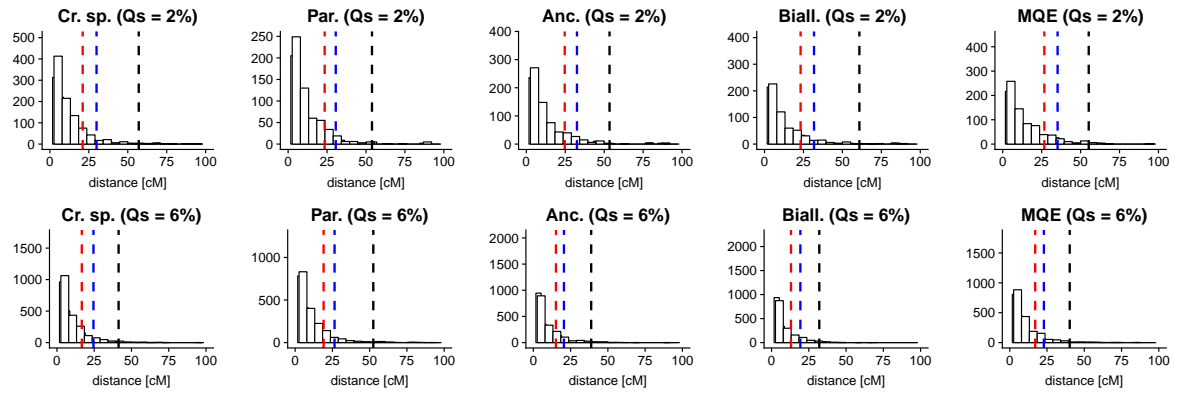

$N = 1600$

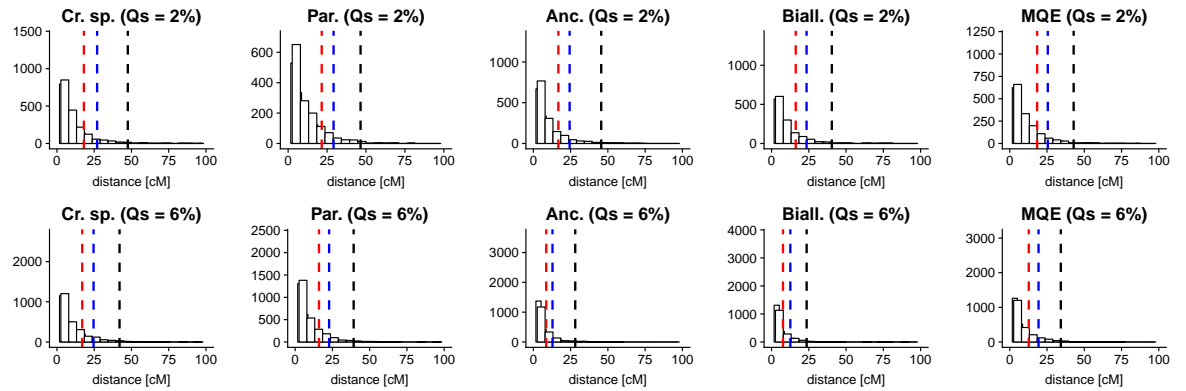

Supplement: 12863_2021_960_MOESM5_ESM.pdf [file 12863_2021_960_MOESM5_ESM.pdf]
