# Supplementary material for: The influence of QTL allelic diversity on QTL detection in multi-parent populations: a simulation study in sugar beet
Source: PubMed Central journal article supplement (PMC7860181; doi:10.1186/s12863-021-00960-9), 2021-02-03
Supplement: 12863_2021_960_MOESM6_ESM.pdf [file 12863_2021_960_MOESM6_ESM.pdf]

## A. ANOVA results N=800 populations

Table 1: ANOVA degrees of freedom (df), and F-statistics with significance of the MPP design, the number of parents, the QTL detection model, the QTL size and the QTL effect on TPR per QTL genetic model (cross-specific, parental, ancestral, bi-allelic, and MQE) for the N = 800 populations. Adjusted and cross-validation R2 of the models.

|                       | df                   | Cr. sp. |     | Parental | Ancestral |        | Bi-allelic |        | MQE  |      |
|-----------------------|----------------------|---------|-----|----------|-----------|--------|------------|--------|------|------|
| MPP des               | 3                    | 91.9    | *** | 2.6      | 1.4       |        | 3.4        | *      | 15.6 | ***  |
| Nb. par               | 1                    | 188.6   | *** | 131.8    | ***       | 37     | ***        | 22.4   | ***  | 97   |
| Det. model            | 3                    | 75.5    | *** | 8.9      | ***       | 87.4   | ***        | 99     | ***  | 5    |
| QTL size              | 1                    | 693.3   | *** | 845.1    | ***       | 1372.9 | ***        | 1167.8 | ***  | 824  |
| QTL type              | 0 – 3 <sup>a</sup>   | 8.5     | **  | 0        |           | 0      |            |        |      | 10.9 |
| MPP des x Nb. par     | 3                    | 9.7     | *** | 1.8      |           | 1.3    |            | 0.1    |      | 3.4  |
| MPP des x Det. model  | 9                    | 4.5     | *** | 1.2      |           | 1.9    |            | 1.5    |      | 0.5  |
| MPP des x QTL size    | 3                    | 2.4     |     | 3.1      | *         | 11.2   | ***        | 0.8    |      | 0.3  |
| Nb. par x Det. model  | 3                    | 3.2     | *   | 2.5      |           | 13.9   | ***        | 13.3   | ***  | 2.3  |
| Nb. par x QTL size    | 1                    | 5.3     | *   | 22       | ***       | 1.1    |            | 1.4    |      | 3.5  |
| Det. model x QTL size | 3                    | 22      | *** | 6.3      | ***       | 17.8   | ***        | 17.3   | ***  | 0.2  |
| Residuals             | 94 – 97 <sup>a</sup> |         |     |          |           |        |            |        |      |      |
| adj. R2 (%)           |                      | 92      |     | 89       |           | 93     |            | 96     |      | 67   |
| CV R2 (%)             |                      | 90      |     | 85       |           | 91     |            | 92     |      | 65   |

\* p < 0.05; \*\* p < 0.01; \*\*\* p < 0.001

a. The df of the QTL type term is equal to 1, 1, 1, 0, 3 from the Cr. sp. to the MQE genetic model. The df of the residuals change according to the df of the QTL type term.

## B. ANOVA results N=1600 populations

Table 2: ANOVA degrees of freedom (df), and F-statistics with significance of the MPP design, the number of parents, the QTL detection model, the QTL size and the QTL effect on TPR per QTL genetic model (cross-specific, parental, ancestral, bi-allelic, and MQE) for the N = 1600 populations. Adjusted and cross-validation R2 of the models.

|                       | df                   | Cr. sp. |     | Parental | Ancestral |        | Bi-allelic |        | MQE |       |
|-----------------------|----------------------|---------|-----|----------|-----------|--------|------------|--------|-----|-------|
| MPP des               | 3                    | 44.8    | *** | 1        | 4.4       | **     | 0.8        |        | 4.4 | **    |
| Nb. par               | 1                    | 69.6    | *** | 4.5      | *         | 0      |            | 1.6    |     | 13.2  |
| Det. model            | 3                    | 122.2   | *** | 9.6      | ***       | 113    | ***        | 125    | *** | 0.3   |
| QTL size              | 1                    | 328.3   | *** | 623.8    | ***       | 2614.8 | ***        | 2217.6 | *** | 952.7 |
| QTL type              | 0 – 3 <sup>a</sup>   | 28.2    | *** | 17.1     | ***       | 13     | ***        |        |     | 10.9  |
| MPP des x Nb. par     | 3                    | 19.9    | *** | 0.5      |           | 4.5    | **         | 4      | *   | 5.9   |
| MPP des x Det. model  | 9                    | 5.9     | *** | 1        |           | 5.5    | ***        | 3.5    | **  | 0.3   |
| MPP des x QTL size    | 3                    | 4.9     | **  | 0.1      |           | 0.4    |            | 0.5    |     | 1.9   |
| Nb. par x Det. model  | 3                    | 8.9     | *** | 1        |           | 17.6   | ***        | 16.5   | *** | 1.3   |
| Nb. par x QTL size    | 1                    | 17.3    | *** | 28.7     | ***       | 242.9  | ***        | 54.9   | *** | 44.7  |
| Det. model x QTL size | 3                    | 2.6     |     | 8.2      | ***       | 22.7   | ***        | 20     | *** | 6.8   |
| Residuals             | 94 – 97 <sup>a</sup> |         |     |          |           |        |            |        |     |       |
| adj. R2 (%)           |                      | 89      |     | 85       |           | 96     |            | 98     |     | 69    |
| CV R2 (%)             |                      | 85      |     | 80       |           | 95     |            | 95     |     | 66    |

\* p < 0.05; \*\* p < 0.01; \*\*\* p < 0.001

a. The df of the QTL type term is equal to 1, 1, 1, 0, 3 from the Cr. sp. to the MQE genetic model. The df of the residuals change according to the df of the QTL type term.
