# Supplementary material for: The influence of QTL allelic diversity on QTL detection in multi-parent populations: a simulation study in sugar beet
Source: PubMed Central journal article supplement (PMC7860181; doi:10.1186/s12863-021-00960-9), 2021-02-03
Supplement: 12863_2021_960_MOESM7_ESM.pdf [file 12863_2021_960_MOESM7_ESM.pdf]

## A. Confidence intervals when generating and detection QTL model are the same

Table 1: Empirical confidence intervals in cM based on the 90, 95 and 99 percentile values from the dQTL distribution per QTL size (small 2% and big 6%), per QTL genetic model (cross-specific, parental, ancestral, bi-allelic, and MQE), and per population size (N = 800 and N = 1600).

|        |            | small QTLs (2%) |      |      |        | big QTLs (6%) |      |      |        |
|--------|------------|-----------------|------|------|--------|---------------|------|------|--------|
|        |            | Cr. sp.         | Par. | Anc. | Biall. | Cr. sp.       | Par. | Anc. | Biall. |
| N=800  | .90        | 33              | 38   | 49   | 42     | 21            | 28   | 24   | 19     |
|        | .95        | 48              | 49   | 63   | 59     | 30            | 40   | 36   | 34     |
|        | .99        | 98              | 62   | 90   | 110    | 49            | 77   | 69   | 62     |
|        | N det. QTL | 480             | 179  | 325  | 429    | 1236          | 828  | 1114 | 1243   |
|        | % det. QTL | 30              | 11   | 20   | 27     | 77            | 52   | 70   | 78     |
| N=1600 | .90        | 21              | 36   | 29   | 26     | 11            | 19   | 12   | 8      |
|        | .95        | 31              | 49   | 44   | 41     | 17            | 26   | 19   | 14     |
|        | .99        | 69              | 81   | 81   | 75     | 35            | 45   | 37   | 37     |
|        | N det. QTL | 1072            | 551  | 863  | 975    | 1451          | 1310 | 1412 | 1442   |
|        | % det. QTL | 67              | 34   | 54   | 61     | 91            | 82   | 88   | 90     |

## B. Confidence intervals for chromosomes with only one detected QTL

Table 2: Empirical confidence intervals in cM based on the 90, 95 and 99 percentile values from the dQTL distribution per QTL size (small 2% and big 6%), per QTL genetic model (cross-specific, parental, ancestral, bi-allelic, and MQE), and per population size (N = 800 and N = 1600).

|        |            | small QTLs (2%) |      |      |        |      | big QTLs (6%) |      |      |        |      |
|--------|------------|-----------------|------|------|--------|------|---------------|------|------|--------|------|
|        |            | Cr. sp.         | Par. | Anc. | Biall. | MQE  | Cr. sp.       | Par. | Anc. | Biall. | MQE  |
| N=800  | .90        | 42              | 47   | 47   | 45     | 49   | 32            | 37   | 30   | 26     | 32   |
|        | .95        | 57              | 61   | 62   | 63     | 68   | 45            | 52   | 40   | 38     | 43   |
|        | .99        | 106             | 108  | 105  | 136    | 110  | 79            | 98   | 74   | 63     | 75   |
|        | N det. QTL | 1369            | 773  | 1000 | 924    | 1094 | 3535          | 2955 | 3635 | 3692   | 3468 |
|        | % det. QTL | 21              | 12   | 16   | 14     | 17   | 55            | 46   | 57   | 58     | 54   |
| N=1600 | .90        | 35              | 42   | 31   | 31     | 34   | 31            | 31   | 16   | 15     | 23   |
|        | .95        | 48              | 55   | 45   | 46     | 48   | 45            | 43   | 24   | 24     | 36   |
|        | .99        | 86              | 89   | 84   | 75     | 77   | 77            | 76   | 54   | 47     | 64   |
|        | N det. QTL | 3015            | 2026 | 2674 | 2541   | 2510 | 4566          | 4799 | 5216 | 5349   | 4939 |
|        | % det. QTL | 47              | 32   | 42   | 40     | 39   | 71            | 75   | 82   | 84     | 77   |
